# Supplementary material for: Fcγ receptor–mediated cross-linking codefines the immunostimulatory activity of anti-human CD96 antibodies
Source: JCI journal article supplement (doi:10.1172/jci.insight.158444), 2022-08-23
Supplement: sd1 [file 1]

You are being redirected.
