# Supplementary material for: Fcγ receptor–mediated cross-linking codefines the immunostimulatory activity of anti-human CD96 antibodies
Source: JCI journal article supplement (doi:10.1172/jci.insight.158444), 2022-08-23
Supplement: sd1 [file 1]

Supplemental Figures

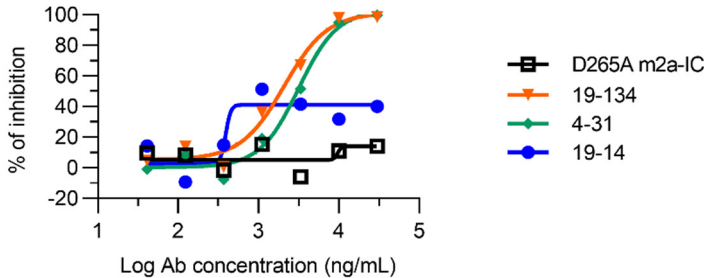

**Supplemental Figure 1.** CHO cell transfectants expressing human CD96 were incubated with biotinylated CD155-Fc and titrated amounts of D265A m2a anti-CD96 Ab clones or an isotype control (IC). Biotinylated CD155-Fc binding was detected using fluorescently-labelled streptavidin and flow cytometry. Data are shown as the percentage of inhibition of CD155-CD96 interaction. Dose response curves were obtained from GraphPad Prism software using a non-linear regression fit with a variable slope model.

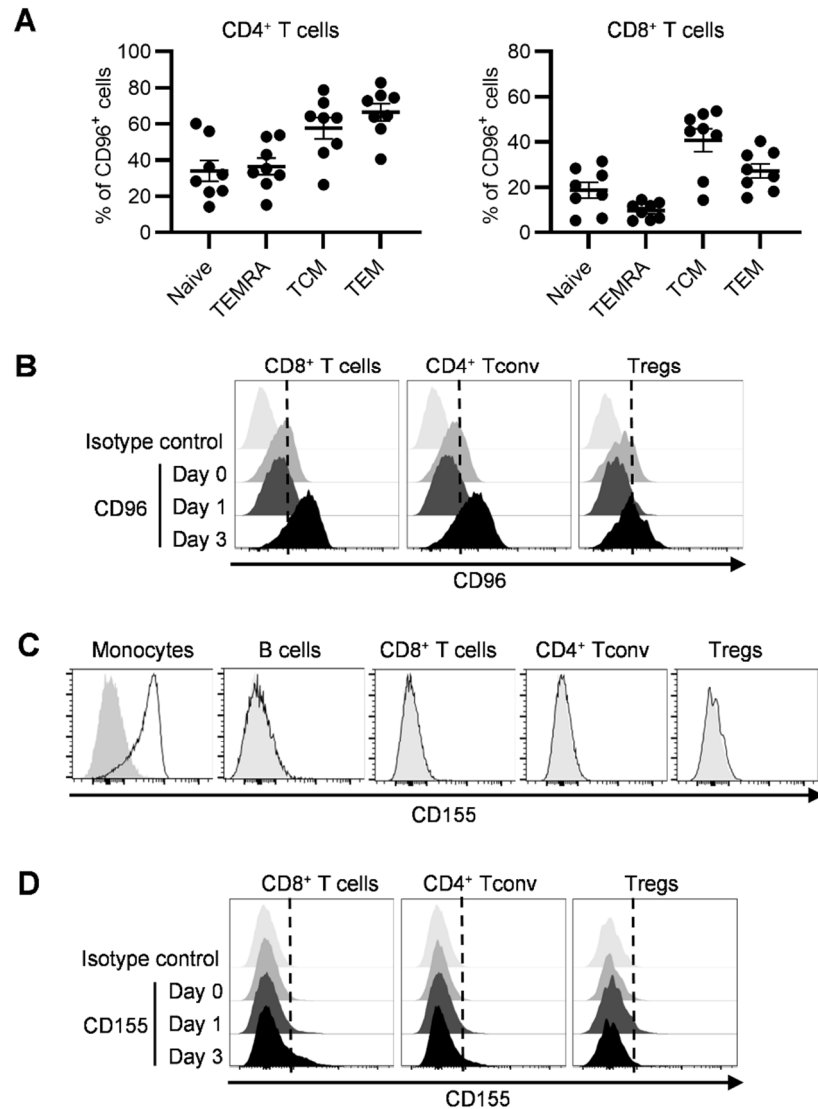

**Supplemental Figure 2.** The expression of CD96 and CD155 on resting and activated PBMCs from HD was analyzed by flow cytometry. **(A)** Frequency of CD96<sup>+</sup> cells among resting naive (CCR7<sup>hi</sup> CD45RA<sup>hi</sup>), effector memory (TEM; CCR7<sup>lo</sup> CD45RA<sup>lo</sup>), central memory (TCM; CCR7<sup>hi</sup> CD45RA<sup>lo</sup>) and terminally-differentiated memory (TEMRA; CCR7<sup>lo</sup> CD45RA<sup>hi</sup>) CD4<sup>+</sup> and CD8<sup>+</sup> T cells. Data show the mean  $\pm$  SEM, with each symbol representing an individual HD. **(B)** Data show representative examples of CD96 expression on T-cell subsets, prior to and 1 and 3 days after stimulation with soluble OKT3. **(C and D)** Data show representative examples of **(C)** CD155 expression (black lines) or the corresponding isotype control (shaded histograms) on myeloid and lymphoid subsets prior to OKT3 stimulation and **(D)** of CD155 expression on T-cell subsets prior to and 1 and 3 days after soluble OKT3 stimulation. **(B-D)** Data are from one HD representative of 4, analyzed in n=2 independent experiments.

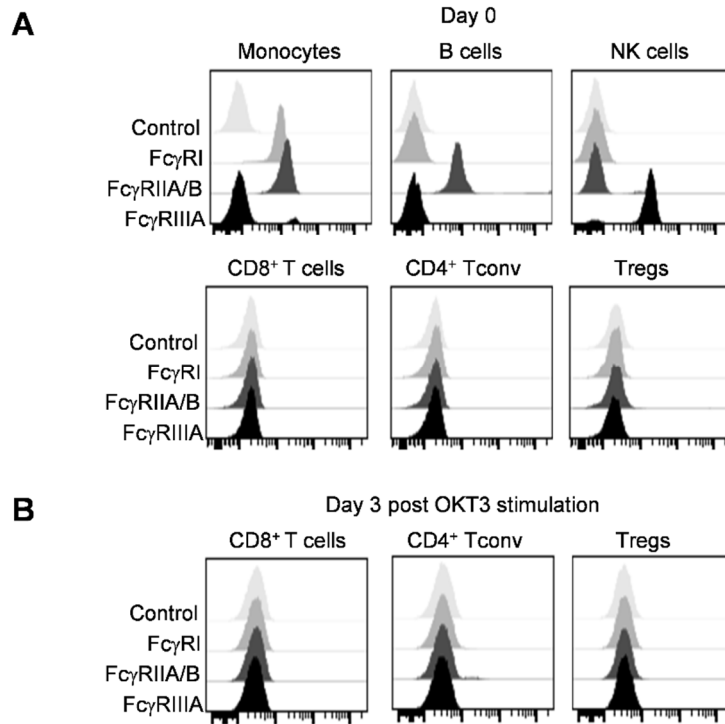

**Supplemental Figure 3.** The expression of Fc $\gamma$ RI, Fc $\gamma$ RIIA/B and Fc $\gamma$ RIIIA on monocytes, B cells, NK cells, and T-cell subsets was analyzed by flow cytometry on PBMCs from HD, either (A) unstimulated or (B) stimulated for 3 days with soluble OKT3. Data show examples of expression for one HD representative of 4 for monocytes, B cells and NK cells, and representative of 6 for T-cell subsets, from n=3 independent experiments.

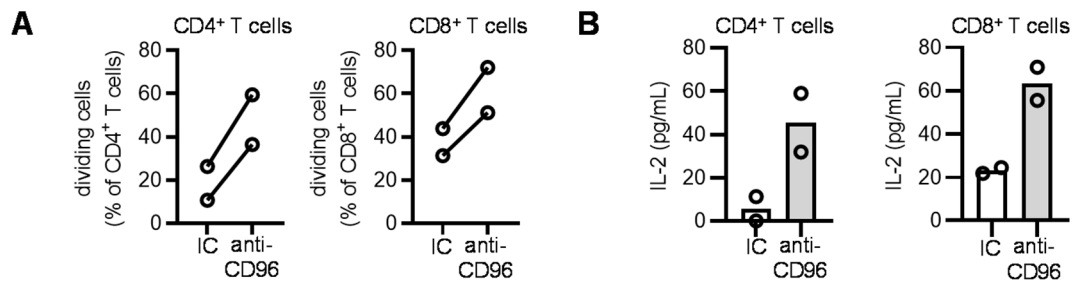

**Supplemental Figure 4.** T-cell subsets were purified from PBMCs from HD by immunomagnetic selection. **(A)** CFSE-labelled CD4<sup>+</sup> or CD8<sup>+</sup> T cells were stimulated with plate-bound OKT3 and plate-bound anti-CD96 huG1 mAb (19-134) or a matching isotype control (IC) for 4 days and the frequency of dividing cells was determined by flow cytometry. **(B)** CD4<sup>+</sup> and CD8<sup>+</sup> T cells were stimulated for 6 hours with plate-bound OKT3 and 19-134 huG1 mAb and IL-2 production was quantified by ELISA. Each data point represents the mean of triplicate wells for an individual donor.

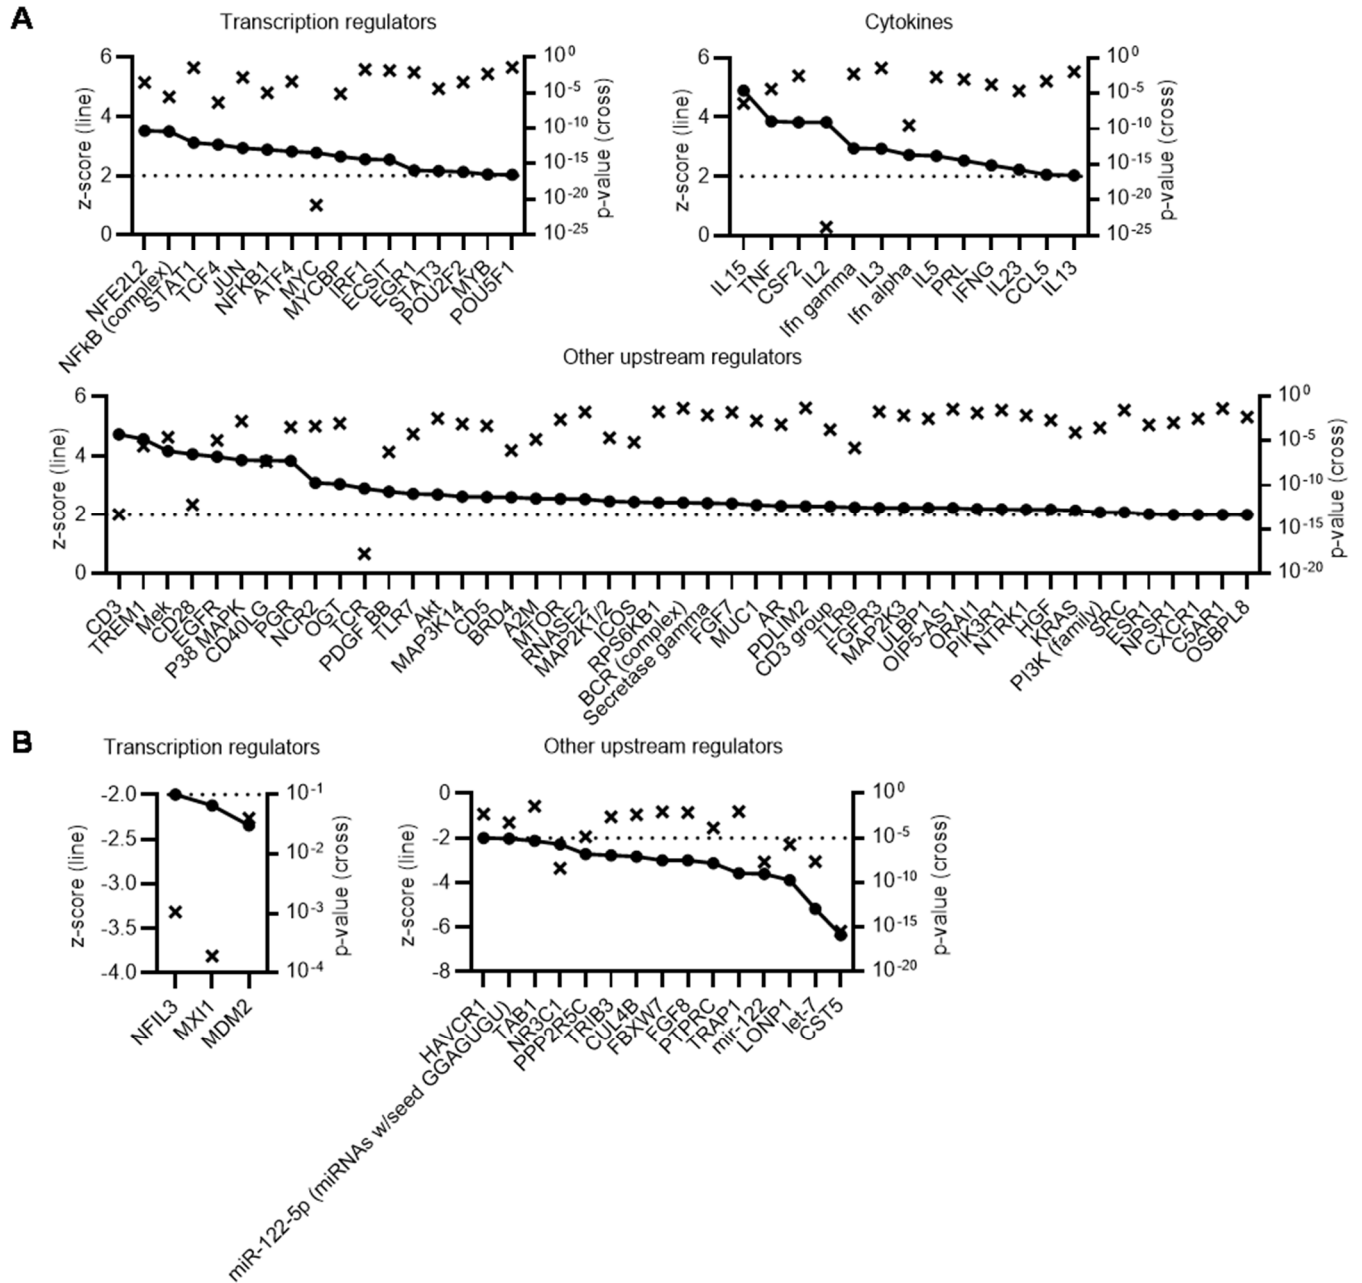

**Supplemental Figure 5.** Purified CD3<sup>+</sup> T cells were stimulated for 6 hours with plate-bound OKT3 and 19-134 huG1 mAb clone or an isotype control, RNA was isolated and samples were submitted to RNA-Seq analysis. Data show upstream regulators of genes that are predicted to be (A) activated or (B) inhibited by anti-CD96 mAb, as identified by IPA; p values (crosses; right axis) and z-scores (line; left axis). Regulators with z-scores  $\geq 2$  are predicted to be activated; regulators with z-scores  $\leq -2$  are predicted to be inhibited.
